# Supplementary material for: Pathway Bridge Based Multiobjective Optimization Approach for Lurking Pathway Prediction
Source: Hindawi journal article supplement (doi:10.1155/2014/351095), 2014-01-01
Supplement: f1 [file 351095.f1.pdf]

# Supplementary of Pathway Bridge Based Multi-objective Optimization Approach for Lurking Pathway Prediction

Rengjing Zhang, Chen Zhao, Zixiang Xiong, Xiaobo Zhou

October 14, 2013

## 1 Supplementary

### 1.1 Motif Detection of PPI Network by FANMOD Tool

| ID    | Adj                                                                                 | Frequency<br>[Original] | Mean-Freq<br>[Random] | Standard-Dev<br>[Random] | Z-Score | p-Value |
|-------|-------------------------------------------------------------------------------------|-------------------------|-----------------------|--------------------------|---------|---------|
| 31710 | 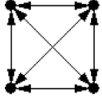   | 0.017858%               | 1.1634e-007%          | 1.6208e-008              | 11018   | 0       |
| 13278 |   | 0.27748%                | 6.9157e-005%          | 4.1539e-006              | 667.84  | 0       |
| 4958  |  | 4.7955%                 | 0.0085102%            | 0.00042599               | 112.37  | 0       |
| 4382  |  | 50.482%                 | 54.627%               | 0.0017771                | -23.325 | 1       |
| 27030 |  | 0.31215%                | 0.24795%              | 7.7688e-005              | 8.264   | 0       |
| 8598  |  | 44.115%                 | 45.117%               | 0.0016806                | -5.9588 | 1       |

Figure 1: Four-vetex Motifs of PPI network by FANMOD Outputs

## 1.2 Raw Pathway Prediction Table for Prostate Cancer

| Possible Protein Paths from miR205 to OCIAD2 in Prostate Cancer |         |        |        |       |         |       |      | Cost <sup>1</sup> |
|-----------------------------------------------------------------|---------|--------|--------|-------|---------|-------|------|-------------------|
| No.                                                             |         |        |        |       |         |       |      |                   |
| 1                                                               | PTPN14  | CDH1   | G-113  | PRKCE |         |       |      | 0.152141          |
| 2                                                               | PTPN14  | TJP1   | GRIN1  | PRKCE |         |       |      | 0.165309          |
| 3                                                               | PTPN14  | YWHAG  | TIAM1  | PRKCE |         |       |      | 0.182662          |
| 4                                                               | PTPN14  | YWHAG  | SRC    | PRKCE |         |       |      | 0.403788          |
| 5                                                               | PTPN14  | JUP    | SRC    | PRKCE |         |       |      | 0.505998          |
| 6                                                               | TAL2    | MAPK3  | PRKCE  |       |         |       |      | 0.513332          |
| 7                                                               | CAPN2   | NFKBIA | CUL1   | E2F1  |         |       |      | 0.513761          |
| 8                                                               | PKP3    | DSC2   | JUP    | SRC   | PRKCE   |       |      | 0.571772          |
| 9                                                               | CAPN2   | NMT1   | LYN    | PLCG1 | GRIN1   | PRKCE |      | 0.581042          |
| 10                                                              | CAPN2   | NFKBIA | SRC    | PRKCE |         |       |      | 0.671004          |
| 11                                                              | PPP2R1B | RELA   | COMMD1 | CUL1  | E2F1    |       |      | 0.680008          |
| 12                                                              | MYD88   | IRAK2  | HRAS   | GRIN1 | PRKCE   |       |      | 0.755849          |
| 13                                                              | PPP2R1B | RELA   | HDAC3  | CCND1 | NPDC1   | E2F1  |      | 0.761167          |
| 14                                                              | CAPN2   | CDK5R1 | CHN1   |       |         |       |      | 0.775821          |
| 15                                                              | PPP2R1B | SET    | KLF5   | PRKCD | YWHAG   | MDM4  | E2F1 | 0.786134          |
| 16                                                              | PPP2R1B | PPP2CA | CCNG1  | CDK5  | CABLES1 | CC-11 | E2F1 | 0.80783           |
| 17                                                              | PPP2R1B | RELA   | PARP1  | E2F1  |         |       |      | 0.817619          |
| 18                                                              | MYD88   | IL1RAP | RAC1   | CHN1  |         |       |      | 0.833815          |
| 19                                                              | MYD88   | IL1RAP | RAC1   | TIAM1 | PRKCE   |       |      | 0.871396          |
| 20                                                              | PPP2R1B | SET    | SGOL1  | XRCC6 | CC-11   | E2F1  |      | 0.903496          |
| 21                                                              | PPP2R1B | RELA   | HDAC3  | NRIP1 | VDR     | CDK7  | E2F1 | 0.92203           |
| 22                                                              | PTPN14  | CDH1   | IQGAP1 | MAPK1 | PRKCE   |       |      | 0.937152          |
| 23                                                              | MYD88   | IRAK1  | PRKCI  | SRC   | PRKCE   |       |      | 0.949189          |
| 24                                                              | PTPN14  | CDH1   | IRS1   | MAPK1 | PRKCE   |       |      | 0.980665          |
| 25                                                              | PPP2R1B | RELA   | MYC    | GSK3B | E2F1    |       |      | 0.997489          |
| 26                                                              | TAL2    | MAPK3  | MYC    | RBL1  | E2F5    |       |      | 1.011626          |
| 27                                                              | CAPN2   | NMT1   | LYN    | MAPK3 | PRKCE   |       |      | 1.026447          |
| 28                                                              | PPP2R1B | HDAC1  | PHB    | E2F1  |         |       |      | 1.030947          |
| 29                                                              | TAL2    | TCF3   | CREBBP | E2F1  |         |       |      | 1.047172          |
| 30                                                              | PPP2R1B | RELA   | HDAC3  | PPARG | NCOA6   | E2F1  |      | 1.048389          |
| ⋮                                                               | ⋮       | ⋮      | ⋮      | ⋮     | ⋮       | ⋮     | ⋮    | ⋮                 |

## 1.3 Prediction Table of Potential Transcription Factor

| OCIAD2's Transcription Factors Detection in TGFβ Signal |       |        |          |        |        |        |        | Cost     |
|---------------------------------------------------------|-------|--------|----------|--------|--------|--------|--------|----------|
| No.                                                     |       |        |          |        |        |        |        |          |
| 1                                                       | TGFB1 | ITGAV  | ITGB1    | ITGA3  | FHL2   | AR     | OCIAD2 | 0.022027 |
| 2                                                       | TGFB1 | ITGAV  | ITGB1    | FHL2   | AR     | OCIAD2 |        | 0.024967 |
| 3                                                       | TGFB1 | THBS1  | PDGFRB   | PDGFRB | STAT4A | OCIAD2 |        | 0.029893 |
| 4                                                       | TGFB1 | THBS1  | SPARC    | PLAT   | MAPK3  | CAV1   | AR     | 0.033335 |
| 5                                                       | TGFB1 | VTN    | FGF2     | CASP1  | AR     | OCIAD2 |        | 0.035584 |
| 6                                                       | TGFB1 | VTN    | SERPINE1 | KRT18  | RAF1   | AR     | OCIAD2 | 0.036216 |
| 7                                                       | TGFB1 | ACVRL1 | XIAP     | TRAF6  | CAV1   | AR     | OCIAD2 | 0.047305 |
| 8                                                       | TGFB1 | THBS1  | LRP5     | SMAD9  | OCIAD2 |        |        | 0.062151 |
| 9                                                       | TGFB1 | DCN    | EGFR     | AR     | OCIAD2 |        |        | 0.063297 |
| 10                                                      | TGFB1 | TGFBR1 | CAV1     | AR     | TRIM24 | RXRA   | PPARG  | 0.078664 |
| 11                                                      | TGFB1 | TGFBR1 | CAV1     | AR     | PNRC1  | RARG   | OCIAD2 | 0.081610 |
| 12                                                      | TGFB1 | TGFBR1 | CAV1     | AR     | TRIM24 | RXRA   | PPARG  | 0.081804 |
| 13                                                      | TGFB1 | TGFBR1 | CAV1     | AR     | FHL2   | WT1    | OCIAD2 | 0.082158 |
| 14                                                      | TGFB1 | TGFBR1 | SMAD7    | PIAS1  | AR     | OCIAD2 |        | 0.083669 |
| 15                                                      | TGFB1 | TGFBR1 | SMAD7    | PIAS1  | MSX1   | OCIAD2 |        | 0.08367  |
| 16                                                      | TGFB1 | TGFBR1 | SMAD7    | HEYL   | SMAD9  | OCIAD2 |        | 0.083735 |
| 17                                                      | TGFB1 | TGFBR1 | PIK3R1   | PDGFRB | STAT5A | OCIAD2 |        | 0.083851 |
| 18                                                      | TGFB1 | TGFBR1 | PIK3R1   | IL2RB  | STAT5A | OCIAD2 |        | 0.083851 |
| 19                                                      | TGFB1 | TGFBR1 | CAV1     | AR     | OCIAD2 |        |        | 0.086596 |
| 20                                                      | TGFB1 | TGFBR1 | CAV1     | MAPK3  | STAT5A | OCIAD2 |        | 0.087053 |
| 21                                                      | TGFB1 | TGFBR1 | CAV1     | AR     | HIF1A  | OCIAD2 |        | 0.08864  |
| 22                                                      | TGFB1 | TGFBR1 | SMAD7    | OCIAD2 |        |        |        | 0.089536 |
| 23                                                      | TGFB1 | TGFBR1 | SMAD6    | OCIAD2 |        |        |        | 0.089536 |
| 24                                                      | TGFB1 | TGFBR1 | CTNNB1   | AR     | OCIAD2 |        |        | 0.09008  |
| 25                                                      | TGFB1 | TGFBR1 | CAV1     | AR     | NCOA1  | FOS    | USF2   | 0.090869 |
| 26                                                      | TGFB1 | TGFBR1 | CAV1     | AR     | NCOA1  | FOS    | OCIAD2 | 0.093771 |
| 27                                                      | TGFB1 | TGFBR1 | CTNNB1   | HIF1A  | OCIAD2 |        |        | 0.095064 |
| 28                                                      | TGFB1 | TGFBR1 | CTNNB1   | MITF   | FOS    | OCIAD2 |        | 0.099917 |
| 29                                                      | TGFB1 | TGFBR1 | PAK1     | CASP1  | AR     | OCIAD2 |        | 0.10004  |
| 30                                                      | TGFB1 | TGFBR1 | CAV1     | AR     | FOXO1  | PPARG  | OCIAD2 | 0.106862 |
| ⋮                                                       | ⋮     | ⋮      | ⋮        | ⋮      | ⋮      | ⋮      | ⋮      | ⋮        |

<sup>1</sup>The less Cost, the more credible the pathway is.
